# Supplementary material for: Hemodynamic shear stress induces protective autophagy in HeLa cells through lipid raft-mediated mechanotransduction
Source: Springer Nature journal article supplement (doi:10.1007/s10585-018-9887-9), 2018-03-01

**Supplementary information**

1. MBCD treatment does not interfere in autophagy induction


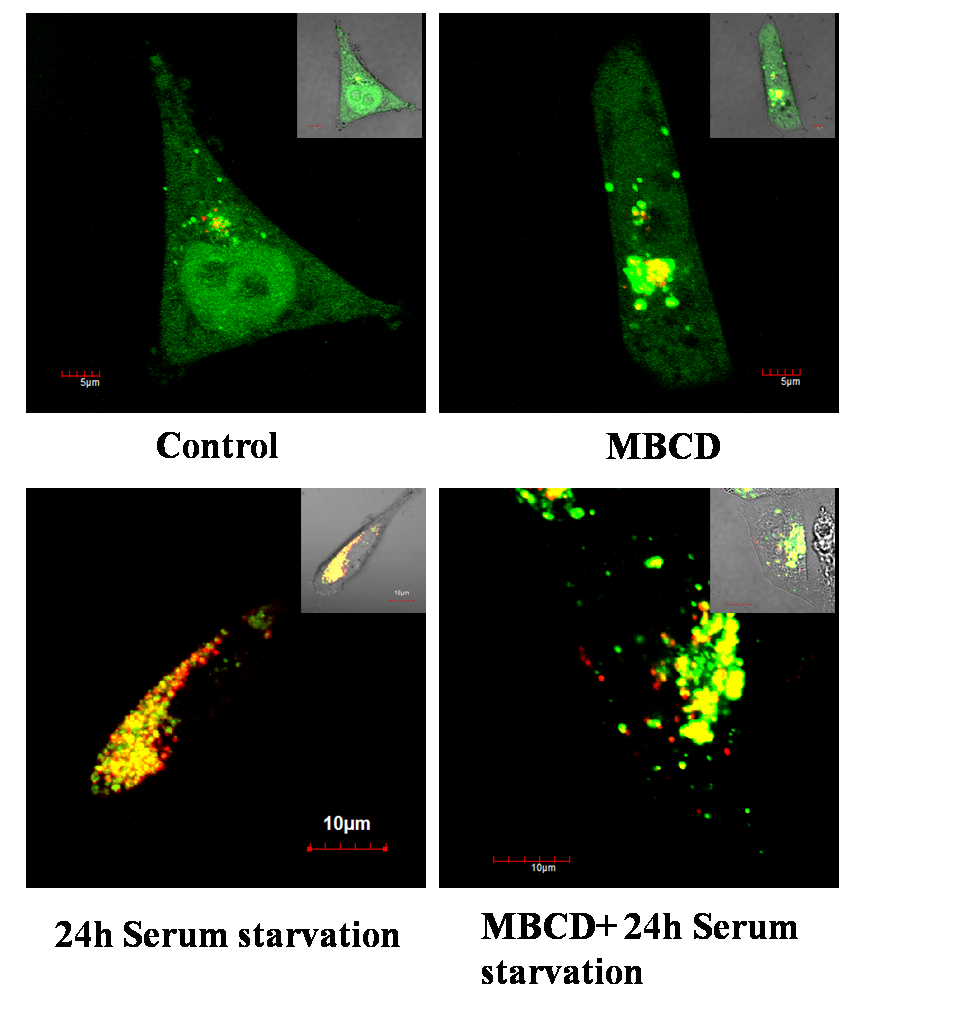


1. 24 hr MTT data of HeLa cells pre-treated with various concentrations of 3 Methyladenine (3MA) and Methyl-betacyclodextrin (MBCD) for 1hr and 30 minutes respectively


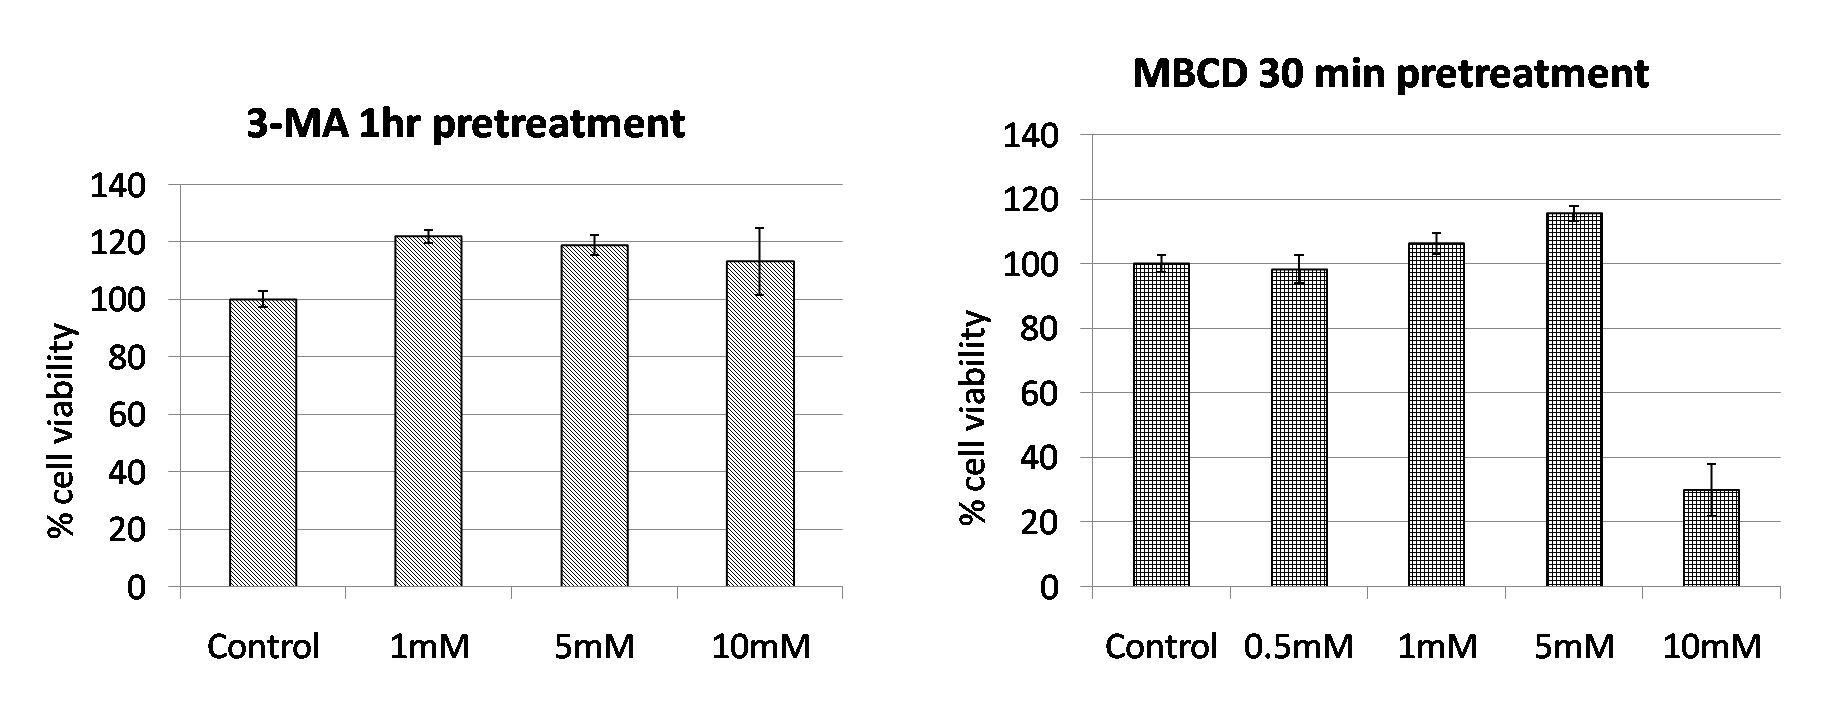


1. Flow cytometry dot plots and comparative analysis of apoptotic and necrotic populations in shear exposed HeLa 229 cells pre-treated with or without 3-MA and MBCD. Significant cell death was found when HeLa 229 cells pre-treated with the authophagy inhibitor, 3MA or the lipid raft inhibitor, MBCD, were exposed to 2 Pa shear stress for 30 passes through a 24-G microneedle.


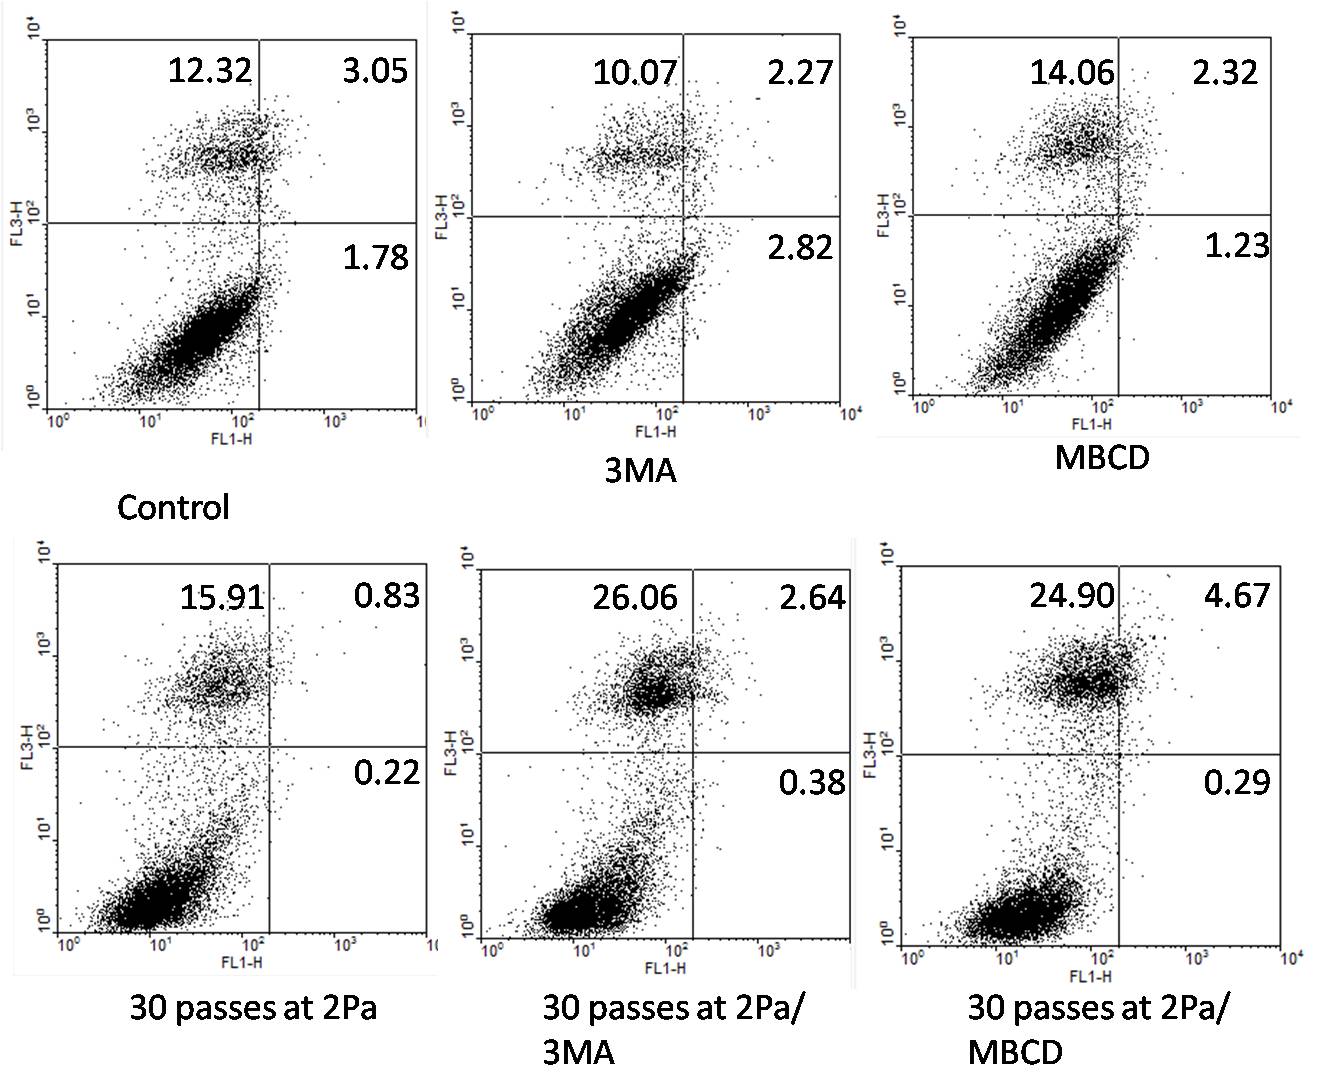


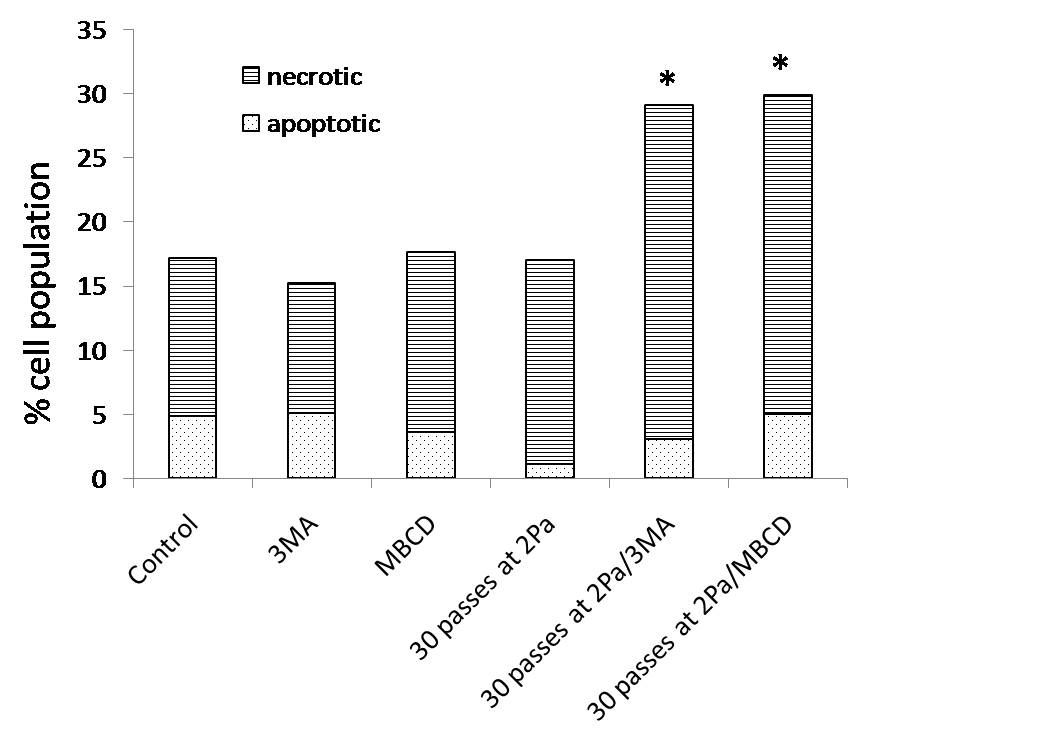


1. Western blot of LC3B AND Beclin1 from whole cell-lysates from HeLa 229 cells, pre-treated/ untreated with p38 MAPK inhibitor SB203580, and exposed to shear stress of 2Pa for 30 passes through a 24-G microneedle. Bar graphs show densitometric analysis of of LC3II/ LC3 I and Beclin1 for different samples normalized against GAPDH. Autophagic flux was seen to reduce significantly ( ~50%) in HeLa 229 cells pre-treated with p38 MAPK inhibitor, SB203580 and exposed to 2Pa shear for 30 passes through 24G microneedle.


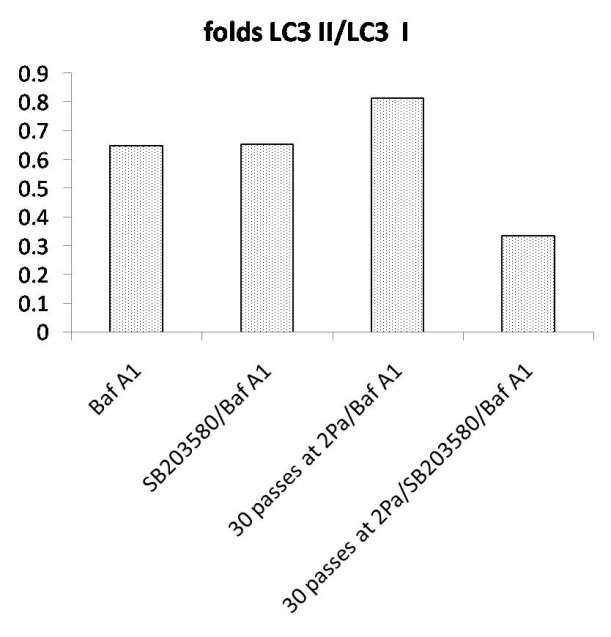

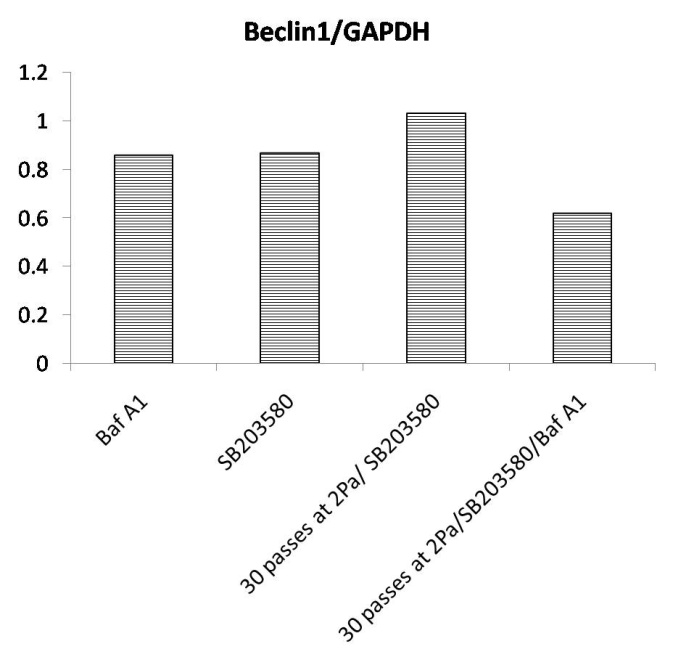

Supplement: MOESM1 [file 15531122]
